# Supplementary material for: Decadal biomass increment in early secondary succession woody ecosystems is increased by CO2 enrichment
Source: PubMed Central journal article supplement (PMC6376023; doi:10.1038/s41467-019-08348-1), 2019-02-14
Supplement: 41467_2019_8348_MOESM1_ESM.pdf [file 41467_2019_8348_MOESM1_ESM.pdf]

Supplementary Information for: Decadal biomass increment in early  
secondary successional woody ecosystems is increased by CO<sub>2</sub>  
enrichment

Walker et al.

November 10, 2018

# Supplementary Figures

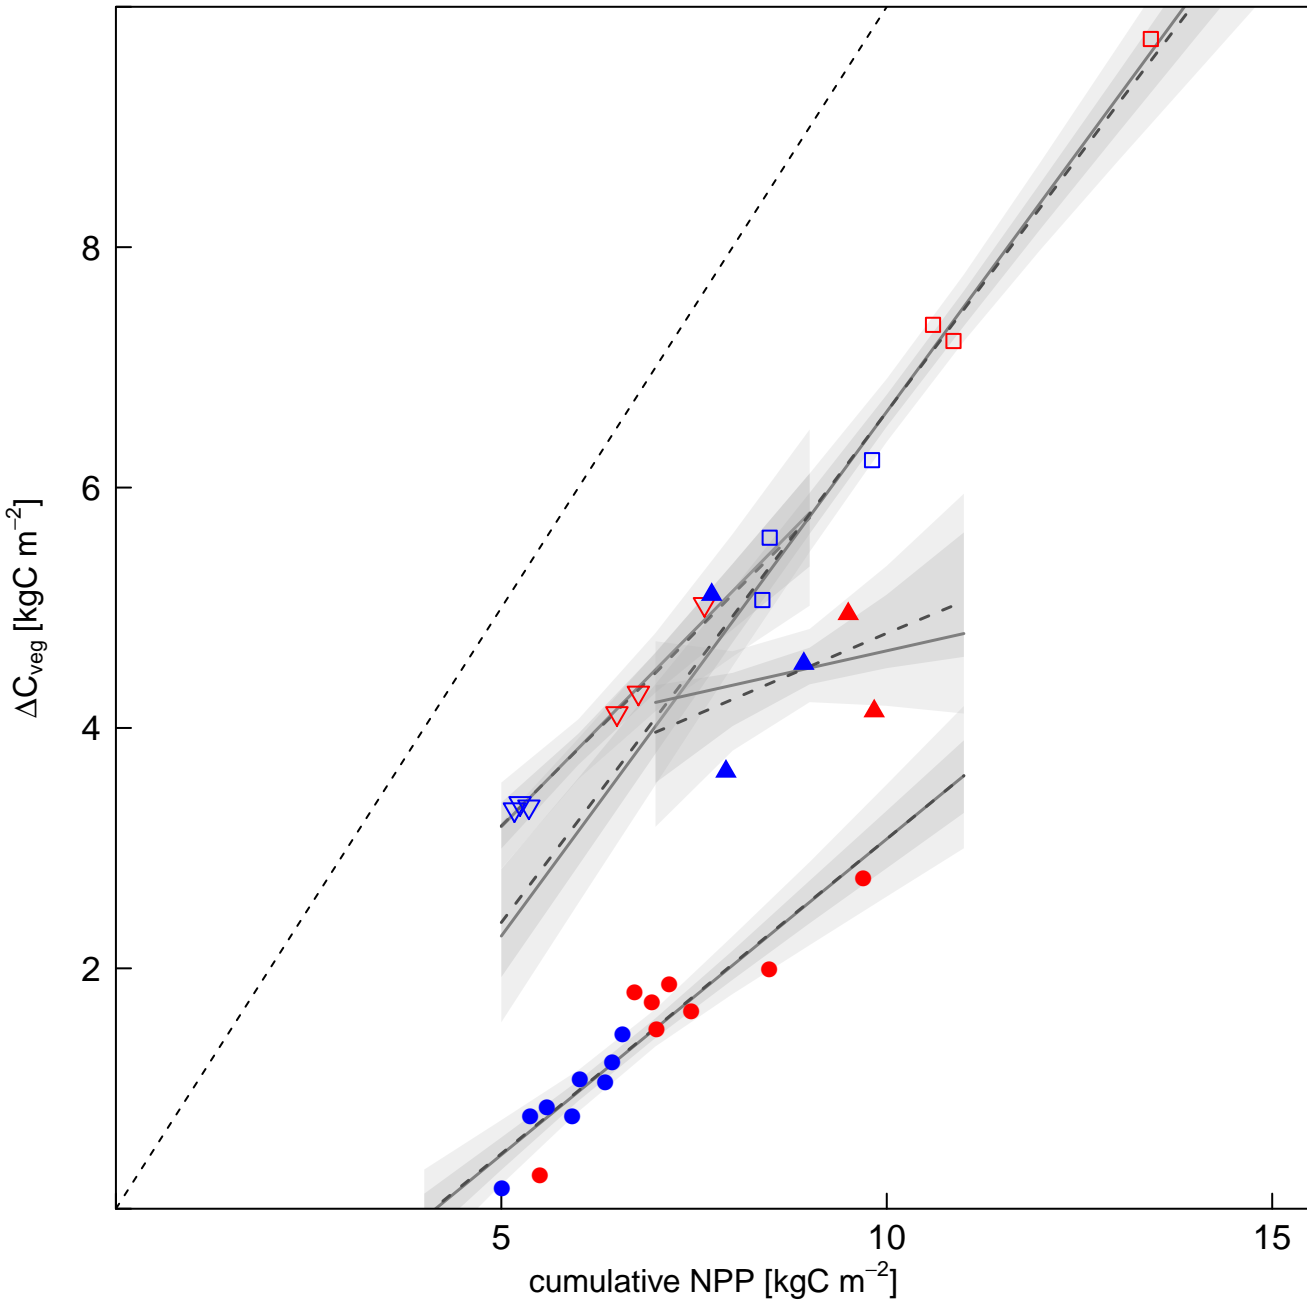

Supplementary Figure 1: Same as Figure 1 but with extended CIs demonstrating strong overlap between Rhineland and Duke relationships. Also shown are the median values of the boot-strapping which show agreement between the mixed-model fit to the data and the boot-strap median value at Rhineland, Duke, and KSC, but not at ORNL. This indicates the need for more replicates to be confident in the relationship and  $\Delta C_{veg}$  response at ORNL.

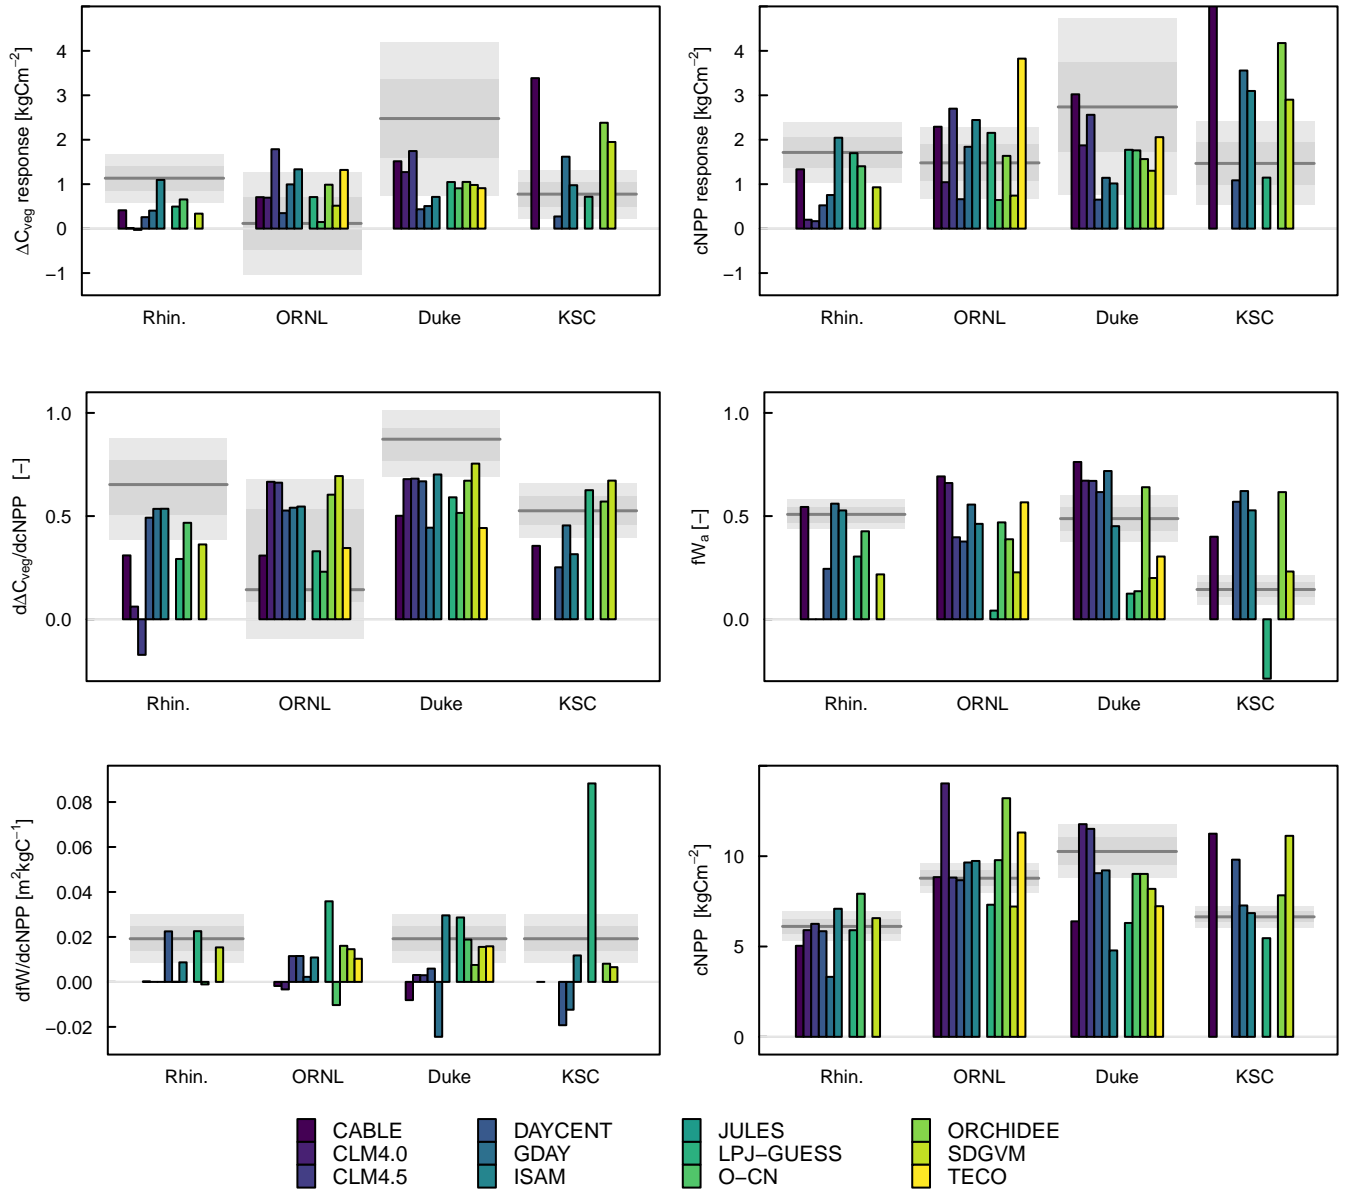

Supplementary Figure 2: As Figure 3 in the main document but individual model predictions of the  $\Delta C_{veg}$  response to  $\text{CO}_2$  enrichment (upper left); the two variables leading to the response—the cNPP response to  $\text{CO}_2$  enrichment (upper right) and  $\frac{d\Delta C_{veg}}{dcNPP}$  (middle left); and the three components of  $\frac{d\Delta C_{veg}}{dcNPP}$ — $fW_a$  (middle right),  $\frac{dfW}{dcNPP}$  (bottom left), and cross-treatment mean cNPP (bottom right). Grey shaded areas represent the observations (dark grey lines represent observed means or regression parameters, light grey polygons represent the  $\pm 1$  s.e. CI and the lighter grey polygons represent the 95 % CI).

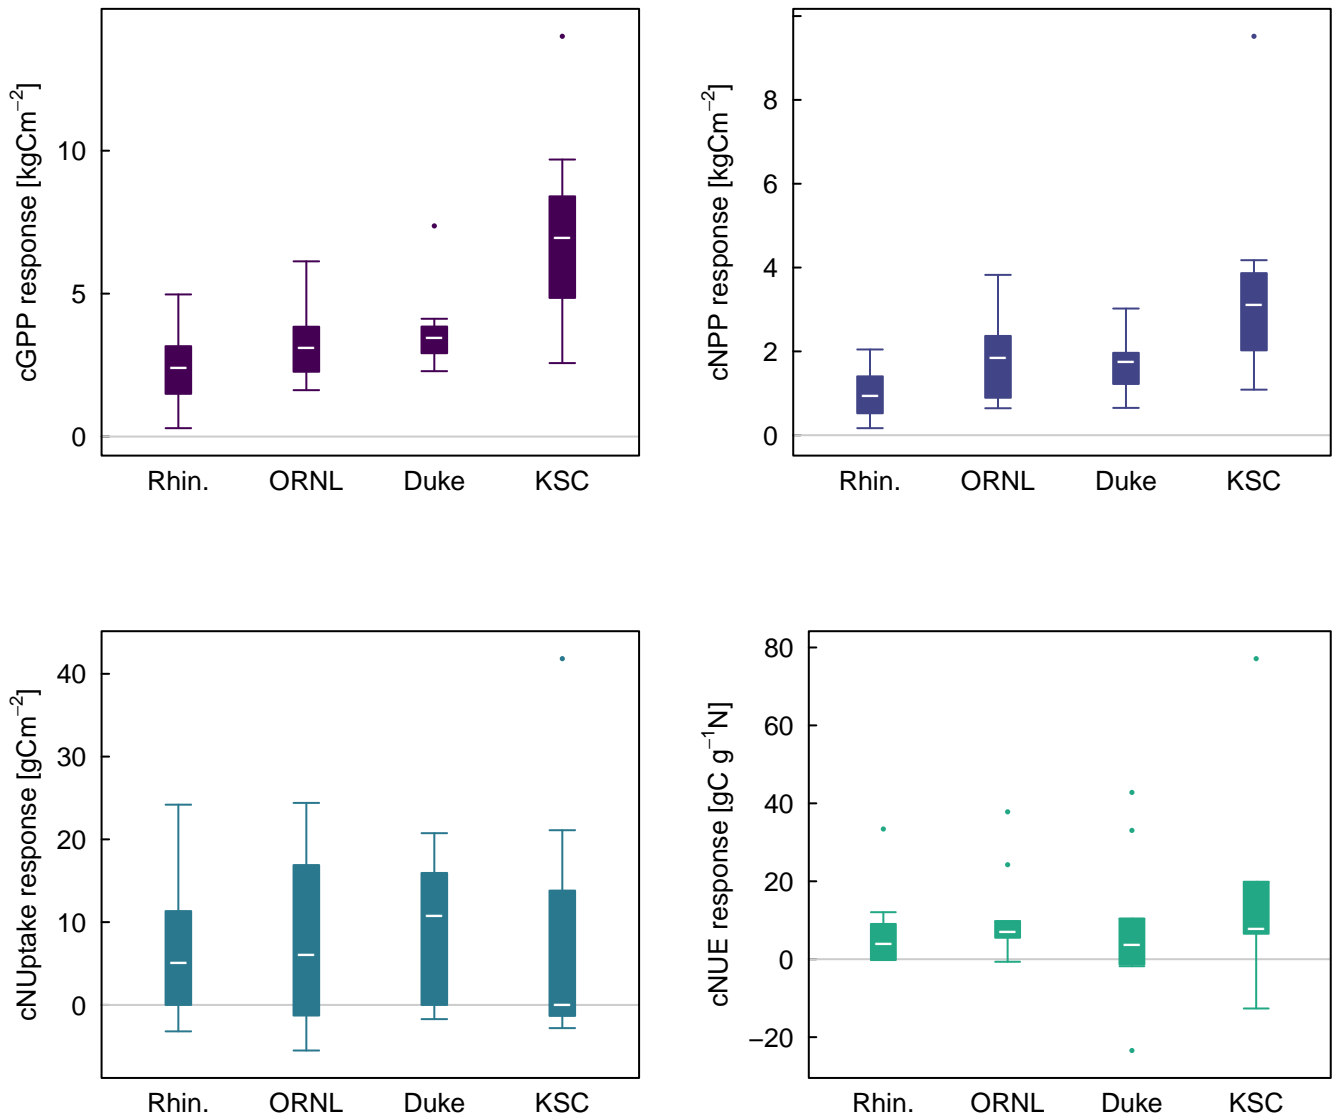

Supplementary Figure 3: Model ensemble predictions of the absolute response to CO<sub>2</sub> enrichment of cumulative GPP; cumulative NPP, cumulative nitrogen uptake; and cumulative nitrogen use efficiency calculated as cNPP/cNUP. The white bar is the median, the box the inter-quartile range, whiskers the range of data within four times the IQR, and dots are outliers.

# Supplementary Tables

Supplementary Table 1: BiomassCO2 model selection

| response         | fixed effects       | random group | random effects      | AICc  | method |
|------------------|---------------------|--------------|---------------------|-------|--------|
| $\Delta C_{veg}$ | (Intercept)         | site         | (Intercept)         | 108.8 | ML     |
| $\Delta C_{veg}$ | (Intercept), co2ELE | site         | (Intercept)         | 98.0  | ML     |
| $\Delta C_{veg}$ | (Intercept), co2ELE | site         | (Intercept), co2ELE | 100.0 | ML     |
| $\Delta C_{veg}$ | (Intercept), co2ELE | site         | (Intercept)         | 97.0  | REML   |
| $\Delta C_{veg}$ | (Intercept), co2ELE | site         | (Intercept), co2ELE | 98.7  | REML   |

Supplementary Table 2: meanNPP model selection

| response | fixed effects     | random group | random effects    | AICc  | method |
|----------|-------------------|--------------|-------------------|-------|--------|
| NPP      | (Intercept)       | site         | (Intercept)       | -24.8 | ML     |
| NPP      | (Intercept), eCO2 | site         | (Intercept)       | -42.2 | ML     |
| NPP      | (Intercept), eCO2 | site         | (Intercept), eCO2 | -39.3 | ML     |
| NPP      | (Intercept), eCO2 | site         | (Intercept)       | -34.7 | REML   |
| NPP      | (Intercept), eCO2 | site         | (Intercept), eCO2 | -31.7 | REML   |

Supplementary Table 3: Biomass model selection

| response         | fixed effects                                  | random group | random effects    | AICc  | method |
|------------------|------------------------------------------------|--------------|-------------------|-------|--------|
| $\Delta C_{veg}$ | (Intercept)                                    | site         | (Intercept)       | 108.8 | ML     |
| $\Delta C_{veg}$ | (Intercept), cNPP, eCO2, cNPP:eCO2             | site         | (Intercept)       | 67.5  | ML     |
| $\Delta C_{veg}$ | (Intercept), cNPP, eCO2                        | site         | (Intercept)       | 65.5  | ML     |
| $\Delta C_{veg}$ | (Intercept), eCO2                              | site         | (Intercept)       | 98.0  | ML     |
| $\Delta C_{veg}$ | (Intercept), cNPP, age <sup>1</sup> , cNPP:age | site         | (Intercept)       | 63.5  | ML     |
| $\Delta C_{veg}$ | (Intercept), cNPP, age, cNPP:age               | site         | (Intercept), cNPP | 66.1  | ML     |
| $\Delta C_{veg}$ | (Intercept), cNPP, age                         | site         | (Intercept)       | 64.8  | ML     |
| $\Delta C_{veg}$ | (Intercept), cNPP, age                         | site         | (Intercept), cNPP | 62.6  | ML     |
| $\Delta C_{veg}$ | (Intercept), cNPP                              | site         | (Intercept)       | 63.2  | ML     |
| $\Delta C_{veg}$ | (Intercept), cNPP                              | site         | (Intercept), cNPP | 60.2  | ML     |
| $\Delta C_{veg}$ | (Intercept), cNPP                              | site         | (Intercept)       | 65.9  | REML   |
| $\Delta C_{veg}$ | (Intercept), cNPP                              | site         | (Intercept), cNPP | 61.1  | REML   |

<sup>1</sup> Age since disturbance.

Supplementary Table 4: WoodAllocation model selection

| response | fixed effects                      | random group | random effects    | AICc  | method |
|----------|------------------------------------|--------------|-------------------|-------|--------|
| fW       | (Intercept)                        | site         | (Intercept)       | -73.6 | ML     |
| fW       | (Intercept), eCO2, cNPP, eCO2:cNPP | site         | (Intercept)       | -77.0 | ML     |
| fW       | (Intercept), eCO2, cNPP            | site         | (Intercept)       | -80.2 | ML     |
| fW       | (Intercept), eCO2                  | site         | (Intercept)       | -79.4 | ML     |
| fW       | (Intercept), cNPP                  | site         | (Intercept)       | -82.3 | ML     |
| fW       | (Intercept), cNPP                  | site         | (Intercept), cNPP | -78.4 | ML     |
| fW       | (Intercept), cNPP                  | site         | (Intercept)       | -70.9 | REML   |
| fW       | (Intercept), cNPP                  | site         | (Intercept), cNPP | -66.9 | REML   |

Supplementary Table 5: ORNLWoodAllocation model selection

| response | fixed effects | parameter | se  | t    | P(t) | F   | dfn   | dfd | P(F) | R2    | AICc         |      |
|----------|---------------|-----------|-----|------|------|-----|-------|-----|------|-------|--------------|------|
| fW       | (Intercept)   | 0.6       | 0.0 | 15.3 | 0.0  | *** | 0.843 | 1   | 3    | 0.426 | 0.22 (-0.04) | 15.2 |
|          | co2ELE        | -0.1      | 0.1 | -0.9 | 0.4  |     |       |     |      |       |              |      |

Supplementary Table 6: ORNLRootAllocation model selection

| response | fixed effects | parameter | se  | t   | P(t) | F | dfn  | dfd | P(F) | R2    | AICc        |      |
|----------|---------------|-----------|-----|-----|------|---|------|-----|------|-------|-------------|------|
| fFR      | (Intercept)   | 0.1       | 0.0 | 2.6 | 0.1  | . | 1.59 | 1   | 3    | 0.296 | 0.35 (0.13) | 15.4 |
|          | co2ELE        | 0.1       | 0.1 | 1.3 | 0.3  |   |      |     |      |       |             |      |
